# Supplementary material for: Social+Me: a persuasive application to increase communication between students and their support networks in Southern Chile
Source: PeerJ journal article supplement (doi:10.7717/peerj-cs.848), 2022-01-27
Supplement: Questionnaire_-_English.pdf [file Questionnaire_-_English.pdf]

## Survey on communication preferences

Fill the following fields with your personal information.

Age: \_\_\_\_\_

Gender: \_\_\_\_\_ Female.

\_\_\_\_\_ Male.

Educational level: \_\_\_\_\_ Incomplete Primary Education.  
\_\_\_\_\_ Complete Primary Education.  
\_\_\_\_\_ Incomplete Secondary Education.  
\_\_\_\_\_ Complete Secondary Education.  
\_\_\_\_\_ Incomplete Technical Education.  
\_\_\_\_\_ Complete Technical Education.  
\_\_\_\_\_ Incomplete University Education.  
\_\_\_\_\_ Incomplete University Education.

What is your current profession or activity?

Do you own a smartphone? : \_\_\_\_\_ Yes.

\_\_\_\_\_ No.

If the answer above is "Yes", what brand and model of smartphone do you have?

For the following types of digital communication, put an "X" in the corresponding line.

**1. Phone Calls:**

Do you use them? Yes \_\_\_\_ No \_\_\_\_

If your answer is "Yes", please answer the following question:

| Frequency of use           | With whom? (Kinship/Relationship) |
|----------------------------|-----------------------------------|
| ___ Daily.                 |                                   |
| ___ Every two days.        |                                   |
| ___ Once or twice a week.  |                                   |
| ___ Less than once a week. |                                   |

**2. Texting (Short Message Service, SMS):**

Do you use them? Yes \_\_\_\_ No \_\_\_\_

If your answer is "Yes", please answer the following question:

| Frequency of use           | With whom? (Kinship/Relationship) |
|----------------------------|-----------------------------------|
| ___ Daily.                 |                                   |
| ___ Every two days.        |                                   |
| ___ Once or twice a week.  |                                   |
| ___ Less than once a week. |                                   |

**3. Facebook.**

Do you use it? Yes \_\_\_\_ No \_\_\_\_

If your answer is "Yes", please answer the following question:

| Frequency of use           | With whom? (Kinship/Relationship) |
|----------------------------|-----------------------------------|
| ___ Daily.                 |                                   |
| ___ Every two days.        |                                   |
| ___ Once or twice a week.  |                                   |
| ___ Less than once a week. |                                   |

**4. Facebook Messenger.**

Do you use it? Yes \_\_\_\_ No \_\_\_\_

If your answer is "Yes", please answer the following question:

| Frequency of use           | With whom? (Kinship/Relationship) |
|----------------------------|-----------------------------------|
| ___ Daily.                 |                                   |
| ___ Every two days.        |                                   |
| ___ Once or twice a week.  |                                   |
| ___ Less than once a week. |                                   |

**5. Twitter.**

Do you use it? Yes \_\_\_\_ No \_\_\_\_

If your answer is “Yes”, please answer the following question:

| Frequency of use           | With whom? (Kinship/Relationship) |
|----------------------------|-----------------------------------|
| ___ Daily.                 |                                   |
| ___ Every two days.        |                                   |
| ___ Once or twice a week.  |                                   |
| ___ Less than once a week. |                                   |

**6. Instagram.**

Do you use it? Yes \_\_\_\_ No \_\_\_\_

If your answer is “Yes”, please answer the following question:

| Frequency of use           | With whom? (Kinship/Relationship) |
|----------------------------|-----------------------------------|
| ___ Daily.                 |                                   |
| ___ Every two days.        |                                   |
| ___ Once or twice a week.  |                                   |
| ___ Less than once a week. |                                   |

**7. Whatsapp.**

Do you use it? Yes \_\_\_\_ No \_\_\_\_

If your answer is “Yes”, please answer the following question:

| Frequency of use           | With whom? (Kinship/Relationship) |
|----------------------------|-----------------------------------|
| ___ Daily.                 |                                   |
| ___ Every two days.        |                                   |
| ___ Once or twice a week.  |                                   |
| ___ Less than once a week. |                                   |

**8. Snapchat.**

Do you use it? Yes \_\_\_\_ No \_\_\_\_

If your answer is “Yes”, please answer the following question:

| Frequency of use           | With whom? (Kinship/Relationship) |
|----------------------------|-----------------------------------|
| ___ Daily.                 |                                   |
| ___ Every two days.        |                                   |
| ___ Once or twice a week.  |                                   |
| ___ Less than once a week. |                                   |

**9. Others.**

Which? \_\_\_\_\_

Do you use it? Yes \_\_\_\_ No \_\_\_\_

If your answer is "Yes", please answer the following question:

| Frequency of use           | With whom? (Kinship/Relationship) |
|----------------------------|-----------------------------------|
| ___ Daily.                 |                                   |
| ___ Every two days.        |                                   |
| ___ Once or twice a week.  |                                   |
| ___ Less than once a week. |                                   |
