# Supplementary material for: Social+Me: a persuasive application to increase communication between students and their support networks in Southern Chile
Source: PeerJ journal article supplement (doi:10.7717/peerj-cs.848), 2022-01-27
Supplement: Questionnaire_-_Spanish.pdf [file Questionnaire_-_Spanish.pdf]

## Encuesta sobre preferencias de comunicación

Complete los siguientes campos respecto a su información personal.

Edad: \_\_\_\_\_

Sexo: \_\_\_\_\_ Femenino.

\_\_\_\_\_ Masculino.

Nivel Educacional: \_\_\_\_\_ Básica Incompleta.

\_\_\_\_\_ Básica Completa.

\_\_\_\_\_ Media Incompleta.

\_\_\_\_\_ Media Completa.

\_\_\_\_\_ Técnica Incompleta.

\_\_\_\_\_ Técnica Completa.

\_\_\_\_\_ Universitaria Incompleta.

\_\_\_\_\_ Universitaria Completa.

¿Cuál es la profesión o actividad ejerce actualmente?

¿Posee un celular tipo Smartphone? : \_\_\_\_\_ Sí.

\_\_\_\_\_ No.

Si su respuesta anterior es "Sí", ¿Qué marca y modelo de celular posee?

Para los siguientes tipos de comunicación digital, marque con una “X” la casilla correspondiente.

**1. Llamadas telefónicas:**

¿Lo utilizas? Sí \_\_\_\_ No \_\_\_\_

Si su respuesta es “Sí” responder a la siguiente pregunta:

| Frecuencia de uso                                   | ¿Con quién? (Parentesco / Relación) |
|-----------------------------------------------------|-------------------------------------|
| <input type="checkbox"/> Diaria.                    |                                     |
| <input type="checkbox"/> Cada dos días.             |                                     |
| <input type="checkbox"/> 1-2 vez por semana.        |                                     |
| <input type="checkbox"/> Menos de 1 vez por semana. |                                     |

**2. Mensajes de texto:**

¿Lo utilizas? Sí \_\_\_\_ No \_\_\_\_

Si su respuesta es “Sí” responder a la siguiente pregunta:

| Frecuencia de uso                                   | ¿Con quién? (Parentesco / Relación) |
|-----------------------------------------------------|-------------------------------------|
| <input type="checkbox"/> Diaria.                    |                                     |
| <input type="checkbox"/> Cada dos días.             |                                     |
| <input type="checkbox"/> 1-2 vez por semana.        |                                     |
| <input type="checkbox"/> Menos de 1 vez por semana. |                                     |

### 3. Facebook.

¿Lo utilizas? Sí \_\_\_\_ No \_\_\_\_

Si su respuesta es "Sí" responder a la siguiente pregunta:

| Frecuencia de uso              | ¿Con quién? (Parentesco / Relación) |
|--------------------------------|-------------------------------------|
| ___ Diaria.                    |                                     |
| ___ Cada dos días.             |                                     |
| ___ 1-2 vez por semana.        |                                     |
| ___ Menos de 1 vez por semana. |                                     |

### 4. Facebook Messenger.

¿Lo utilizas? Sí \_\_\_\_ No \_\_\_\_

Si su respuesta es "Sí" responder a la siguiente pregunta:

| Frecuencia de uso              | ¿Con quién? (Parentesco / Relación) |
|--------------------------------|-------------------------------------|
| ___ Diaria.                    |                                     |
| ___ Cada dos días.             |                                     |
| ___ 1-2 vez por semana.        |                                     |
| ___ Menos de 1 vez por semana. |                                     |

### 5. Twitter.

¿Lo utilizas? Sí \_\_\_\_ No \_\_\_\_

Si su respuesta es "Sí" responder a la siguiente pregunta:

| Frecuencia de uso              | ¿Con quién? (Parentesco / Relación) |
|--------------------------------|-------------------------------------|
| ___ Diaria.                    |                                     |
| ___ Cada dos días.             |                                     |
| ___ 1-2 vez por semana.        |                                     |
| ___ Menos de 1 vez por semana. |                                     |

### 6. Instagram.

¿Lo utilizas? Sí \_\_\_\_ No \_\_\_\_

Si su respuesta es "Sí" responder a la siguiente pregunta:

| Frecuencia de uso              | ¿Con quién? (Parentesco / Relación) |
|--------------------------------|-------------------------------------|
| ___ Diaria.                    |                                     |
| ___ Cada dos días.             |                                     |
| ___ 1-2 vez por semana.        |                                     |
| ___ Menos de 1 vez por semana. |                                     |

### 7. Whatsapp.

¿Lo utilizas? Sí \_\_\_\_ No \_\_\_\_

Si su respuesta es "Sí" responder a la siguiente pregunta:

| Frecuencia de uso              | ¿Con quién? (Parentesco / Relación) |
|--------------------------------|-------------------------------------|
| ___ Diaria.                    |                                     |
| ___ Cada dos días.             |                                     |
| ___ 1-2 vez por semana.        |                                     |
| ___ Menos de 1 vez por semana. |                                     |

### 8. Snapchat.

¿Lo utilizas? Sí \_\_\_\_ No \_\_\_\_

Si su respuesta es "Sí" responder a la siguiente pregunta:

| Frecuencia de uso              | ¿Con quién? (Parentesco / Relación) |
|--------------------------------|-------------------------------------|
| ___ Diaria.                    |                                     |
| ___ Cada dos días.             |                                     |
| ___ 1-2 vez por semana.        |                                     |
| ___ Menos de 1 vez por semana. |                                     |

**9. Otros.**

¿Cuál? \_\_\_\_\_

¿Lo utilizas? Sí \_\_\_\_ No \_\_\_\_

Si su respuesta es "Sí" responder a la siguiente pregunta:

| Frecuencia de uso              | ¿Con quién? (Parentesco / Relación) |
|--------------------------------|-------------------------------------|
| ___ Diaria.                    |                                     |
| ___ Cada dos días.             |                                     |
| ___ 1-2 vez por semana.        |                                     |
| ___ Menos de 1 vez por semana. |                                     |
